# Supplementary material for: A combination of chicken embryo extract and a nutritional supplement protect a rat model of aging againstd-galactose-induced dysfunction of mitochondria and autophagy
Source: Royal Society of Chemistry journal article supplement (doi:10.1039/c8fo01734d), 2019-01-01

**Fig. S1.**

Protein derived from chicken embryo shows anti-aging activity. (A) Representative histopathological images of liver, kidney and brain by HE staining under an Olympus light microscope (scale bars = 50  $\mu$ m). (B) The electron images of liver and kidney were shown at 10,000 magnification, 20,000 magnification and 150,000 magnification respectively. (C) The intracellular ROS level was measured using H2DCF-DA. (D) The mitochondrial membrane potential was determined by fluorescent intensity of Rh123. (E) Autophagy-related proteins (LC3-II and Beclin-1) of liver and brain were detected by Western blot analysis. GAPDH was served as endogenous control.

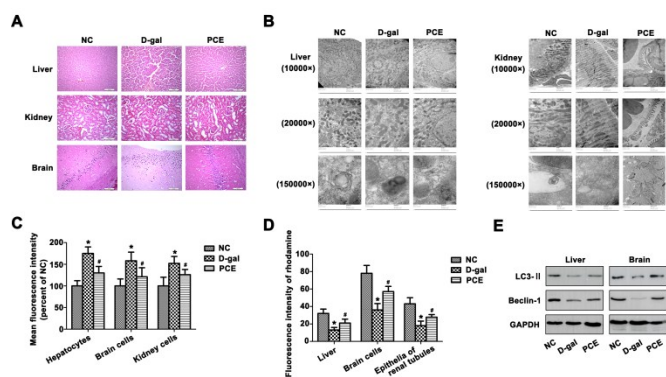

Supplement: c8fo01734d1.pdf [file c8fo01734d1.pdf]
